# Supplementary material for: Pyridine-grafted nitrogen-doped carbon nanotubes achieving efficient electroreduction of CO2to CO within a wide electrochemical window
Source: Royal Society of Chemistry journal article supplement (doi:10.1039/d1ta09491b), 2021-12-31
Supplement: d1ta09491b1.pdf [file d1ta09491b1.pdf]

## Supporting Information

### Pyridine-grafted nitrogen-doped carbon nanotubes achieving efficient electroreduction of CO<sub>2</sub> to CO within a wide electrochemical window

Yuning Zhang, <sup>‡a</sup> Hao Jiang, <sup>‡b</sup> Dongfang Niu, <sup>\*a</sup> Ingo Manke, <sup>c</sup> Chao Yang, <sup>\*c</sup> Minghui Zhu, <sup>a</sup> Xinsheng Zhang, <sup>\*a</sup> and Renjie Chen<sup>d</sup>

<sup>a</sup> State Key Laboratory of Chemical Engineering, School of Chemical Engineering, East China University of Science and Technology, Shanghai 200237, China  
E-mail: dfniu@ecust.edu.cn; xszhang@ecust.edu.cn

<sup>b</sup> Petroleum Processing Research Center, School of Chemical Engineering, East China University of Science and Technology, Shanghai 200237, China

<sup>c</sup> Helmholtz Centre Berlin for Materials and Energy, Hahn-Meitner-Platz 1, Berlin 14109, Germany.  
E-mail: chao.yang@helmholtz-berlin.de

<sup>d</sup> Beijing Key Laboratory of Environmental Science and Engineering, School of Material Science and Engineering, Beijing Institute of Technology, Beijing 100081, China

<sup>‡</sup> These authors contributed equally to this work.

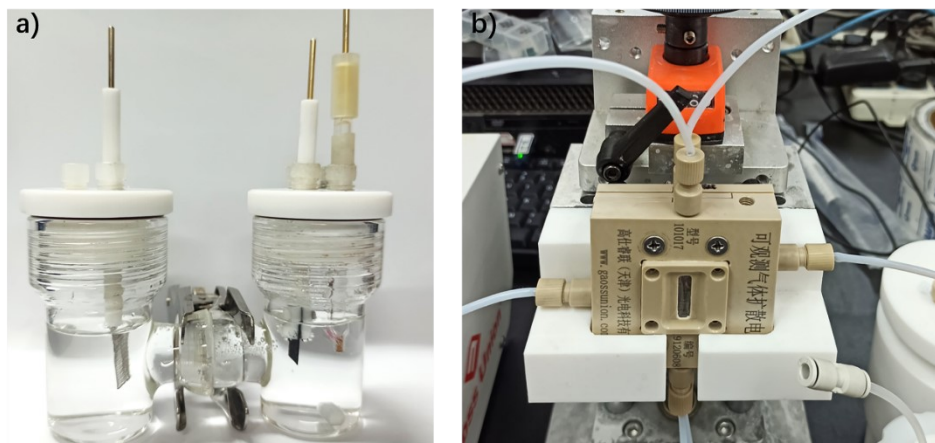

Fig. S1. Pictures of (a) H-type cell and (b) flow cell with an observable gas diffusion electrode.

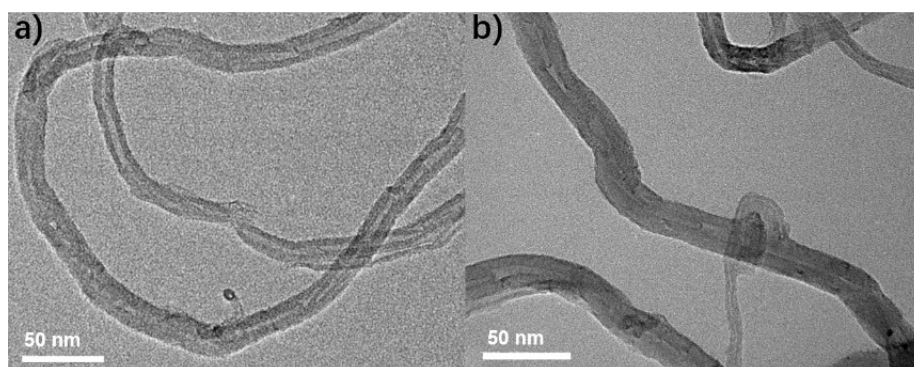

Fig. S2. TEM images of (a) N<sub>4</sub>CNTs-800 and (b) Py-N<sub>4</sub>CNTs-800.

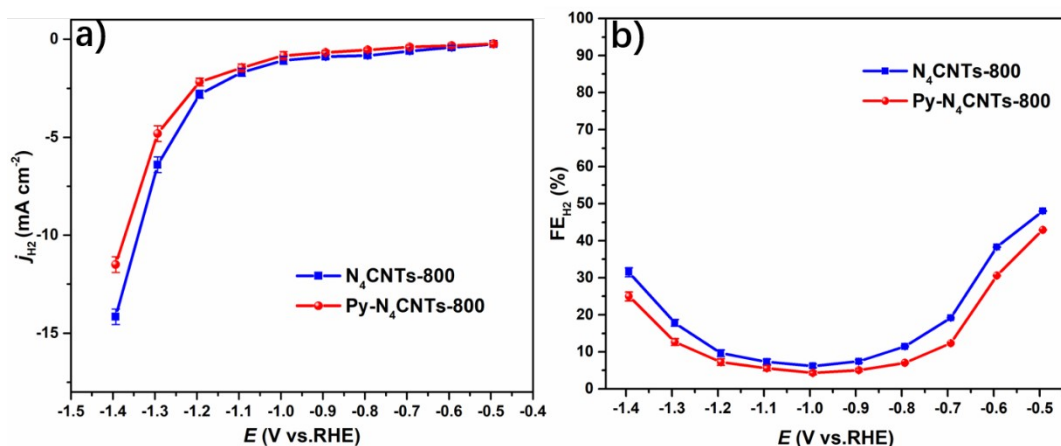

**Fig.S3.** (a) Partial current densities and (b) faradaic efficiencies of H<sub>2</sub> on N<sub>4</sub>CNTs-800 and Py-N<sub>4</sub>CNTs-800 at different potentials.

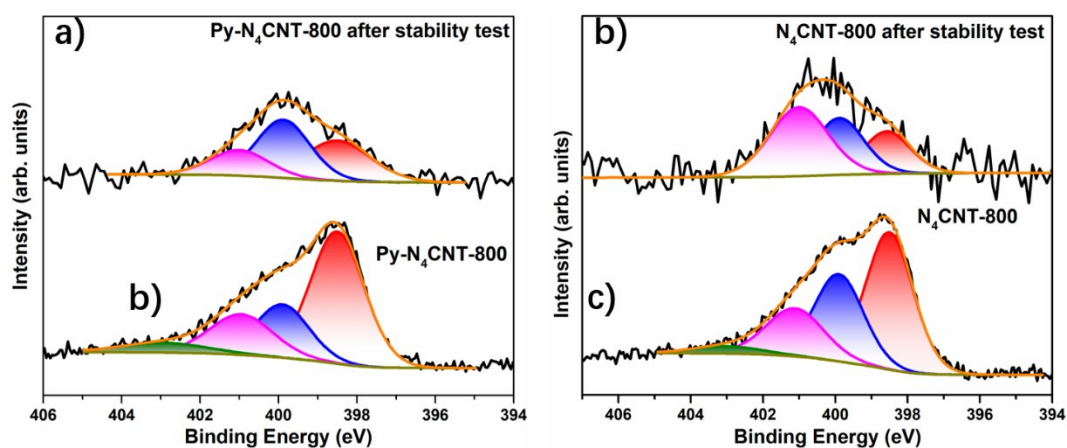

**Fig.S4.** (a) N 1s XPS spectra of Py-N<sub>4</sub>CNTs-800 before and after the stability test. (b) N 1s XPS spectra of N<sub>4</sub>CNTs-800 before and after stability test.

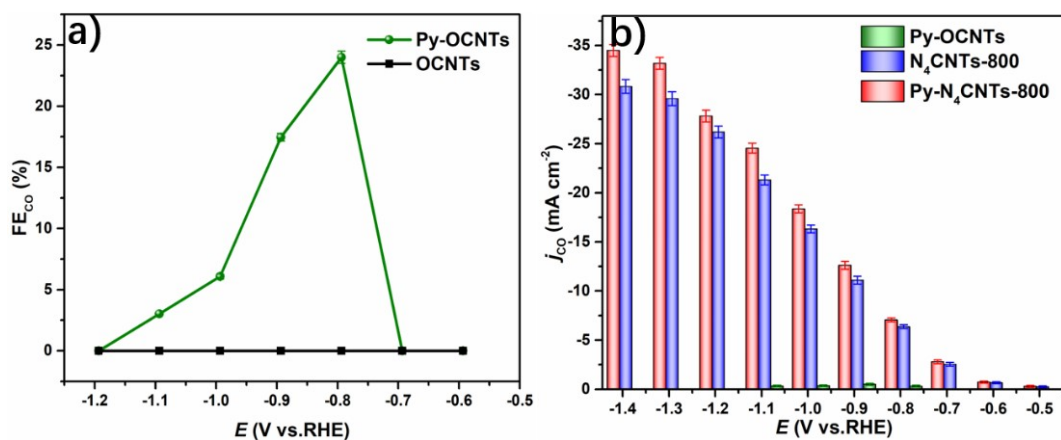

**Fig. S5.** (a) Faradaic efficiencies of CO on OCNTs and Py-OCNTs at different potentials. (b) Partial current densities of CO on Py-OCNTs, N<sub>4</sub>CNTs-800 and Py-N<sub>4</sub>CNTs-800 at different potentials.

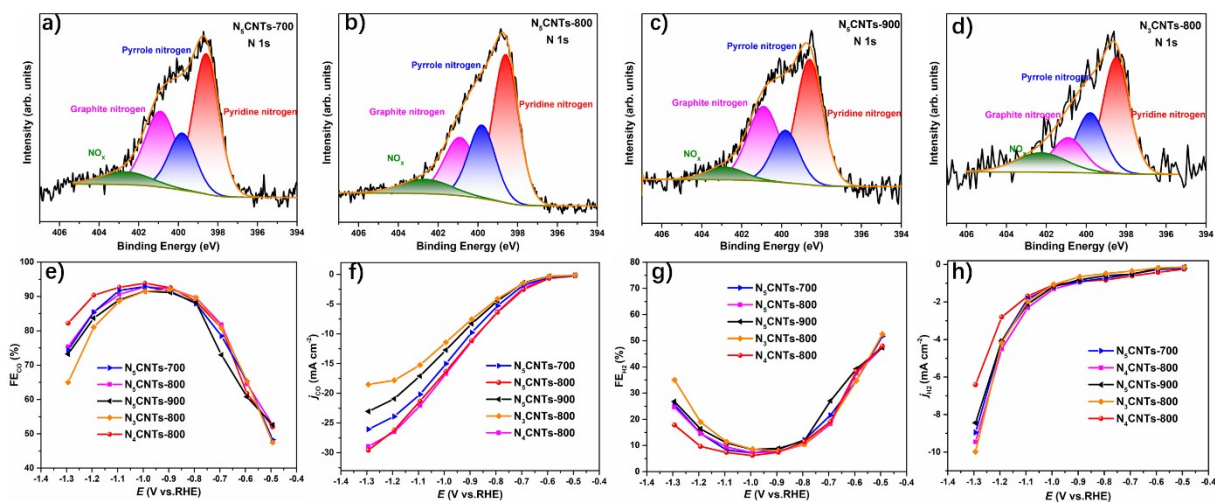

**Fig. S6.** (a) N 1s XPS spectra of N<sub>5</sub>CNTs-700, (b) N<sub>5</sub>CNTs-800 (c) N<sub>5</sub>CNTs-900 and (d) N<sub>3</sub>CNTs-800. (e) Faradaic efficiencies of CO, (f) partial current densities of CO, (g) faradaic efficiencies of H<sub>2</sub> and (h) partial current densities of H<sub>2</sub> on N<sub>4</sub>CNTs-800, N<sub>5</sub>CNTs-700, N<sub>5</sub>CNTs-800, N<sub>5</sub>CNTs-900 and N<sub>3</sub>CNTs-800 at different potentials.

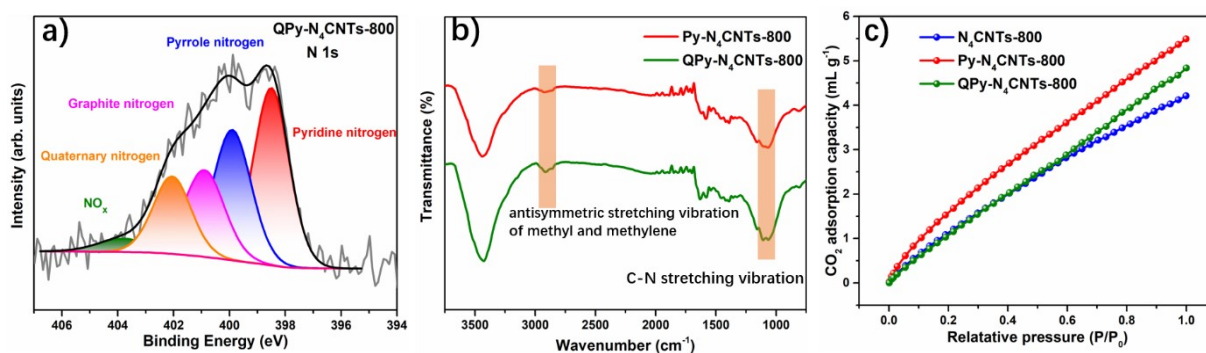

**Fig. S7.** (a) N 1s XPS spectrum of QPy-N<sub>4</sub>CNTs-800. (b) FT-IR spectra Py-N<sub>4</sub>CNTs-800 and QPy-N<sub>4</sub>CNTs-800. (c) CO<sub>2</sub> adsorption isotherms of N<sub>4</sub>CNTs-800, Py-N<sub>4</sub>CNTs-800 and QPy-N<sub>4</sub>CNTs-800.

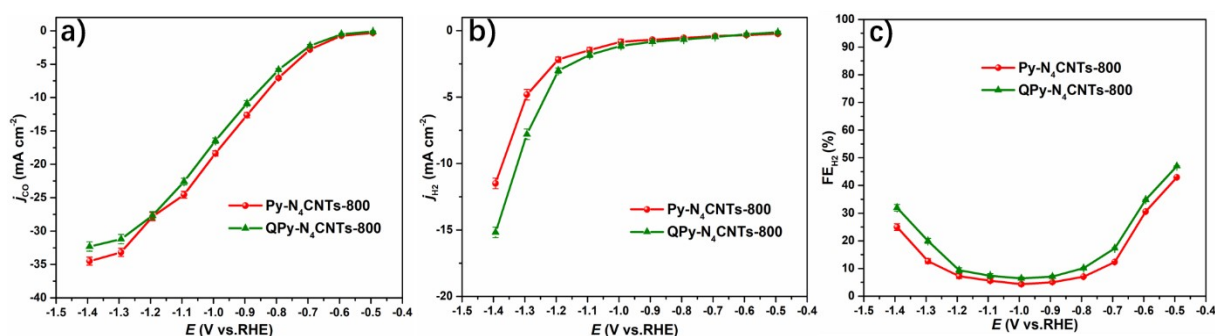

**Fig. S8.** (a) Partial current densities of CO, (b) partial current densities of H<sub>2</sub> and (c) faradaic efficiencies of H<sub>2</sub> on Py-N<sub>4</sub>CNTs-800 and QPy-N<sub>4</sub>CNTs-800 at different potentials.

**Table S1.** The types and content of nitrogen in the prepared catalysts from XPS spectra.

| <b>Samples</b>              | <b>N 1s<br/>(at.%)</b> | <b>Pyridine N<br/>(at.%)</b> | <b>Pyrrole N<br/>(at.%)</b> | <b>Graphite N<br/>(at.%)</b> | <b>NOx<br/>(at.%)</b> | <b>Quaternary N<br/>(at.%)</b> |
|-----------------------------|------------------------|------------------------------|-----------------------------|------------------------------|-----------------------|--------------------------------|
| N <sub>4</sub> CNTs-800     | 4.37                   | 2.04                         | 1.29                        | 0.87                         | 0.17                  | /                              |
| N <sub>3</sub> CNTs-800     | 3.26                   | 1.46                         | 0.81                        | 0.52                         | 0.46                  | /                              |
| N <sub>5</sub> CNTs-700     | 4.26                   | 1.88                         | 0.80                        | 1.26                         | 0.33                  | /                              |
| N <sub>5</sub> CNTs-800     | 4.45                   | 2.02                         | 1.05                        | 0.99                         | 0.38                  | /                              |
| N <sub>5</sub> CNTs-900     | 3.98                   | 1.75                         | 0.73                        | 1.25                         | 0.25                  | /                              |
| Py-N <sub>4</sub> CNTs-800  | 5.38                   | 2.85                         | 1.15                        | 1.03                         | 0.34                  | /                              |
| QPy-N <sub>4</sub> CNTs-800 | 5.35                   | 1.84                         | 1.44                        | 1.02                         | 0.20                  | 0.86                           |

**Table S2. Summary of electrocatalysts studied for CO<sub>2</sub>ER to CO.**

| Samples                    | Electrolyte              | Potential<br>(V vs. RHE) | FE <sub>CO</sub><br>(%) | <i>j</i> <sub>CO</sub><br>(mA cm <sup>-2</sup> ) | Stability<br>(h) | FE <sub>CO</sub> >90<br>(V vs. RHE) | Ref.      |
|----------------------------|--------------------------|--------------------------|-------------------------|--------------------------------------------------|------------------|-------------------------------------|-----------|
| Py-N <sub>4</sub> CNTs-800 | 0.1 M KHCO <sub>3</sub>  | -0.99                    | 96%                     | 18.4                                             | 19.3             | -0.79 ~ -1.19                       | This work |
| NSHCF900                   | 0.1 M KHCO <sub>3</sub>  | -0.7                     | 94%                     | ~96                                              | 36               | -0.7                                | 7         |
| N-GRW                      | 0.5 M KHCO <sub>3</sub>  | -0.40                    | 87.6%                   | ~3.08                                            | 10               | /                                   | 16        |
| CNPC-1100                  | 0.1 M KHCO <sub>3</sub>  | -0.6                     | 92%                     | ~0.8                                             | 8                | -0.6                                | 17        |
| 1D/2D NR/CS-900            | 0.5 M KHCO <sub>3</sub>  | -0.45                    | 94.2%                   | ~1                                               | 30               | -0.45 ~ -0.55                       | 24        |
| NCNT-NH <sub>3</sub>       | 0.5 M NaHCO <sub>3</sub> | -0.8                     | 94.5%                   | ~14                                              | 40               | -0.6 ~ -0.9                         | 26        |
| NF-C-950                   | 0.1 M KHCO <sub>3</sub>  | -0.6                     | 90%                     | 1.9                                              | 40               | -0.6                                | 29        |
| NCNT-3-700                 | 0.5 M NaHCO <sub>3</sub> | -0.9                     | 90%                     | 5                                                | 60               | -0.9                                | 30        |
| NPC-900                    | 0.5 M KHCO <sub>3</sub>  | -0.67                    | 95%                     | 2.3                                              | 10               | -0.67                               | 31        |
| DG                         | 0.1 M KHCO <sub>3</sub>  | -0.6                     | 84%                     | 1.3                                              | 10               | /                                   | 32        |
| NDAPC                      | 0.1 M KHCO <sub>3</sub>  | -0.9                     | 83%                     | ~3.8                                             | 8                | /                                   | 33        |
| DPC-NH <sub>3</sub> -950   | 0.1 M KHCO <sub>3</sub>  | -0.6                     | 95.2%                   | 2.71                                             | 24               | -0.5 ~ -0.7                         | 34        |
| NS-CNSs                    | 0.5 M KHCO <sub>3</sub>  | -0.55                    | 85.4%                   | 2.4                                              | 20               | /                                   | 35        |
| WNCNs                      | 0.1 M KHCO <sub>3</sub>  | -0.6                     | 84%                     | 1.15                                             | 8                | /                                   | 36        |
| NS-C-900                   | 0.1 M KHCO <sub>3</sub>  | -0.6                     | 92%                     | 2.63                                             | 20               | -0.6                                | 37        |
| NG-800                     | 0.1 M KHCO <sub>3</sub>  | -0.58                    | 85%                     | ~1.53                                            | 5                | /                                   | 55        |
| SZ-HCN                     | 0.1 M KHCO <sub>3</sub>  | -0.6                     | 93%                     | ~4.65                                            | 20               | -0.6                                | 56        |
| NRMC-900                   | 0.1 M KHCO <sub>3</sub>  | -0.6                     | 80%                     | 2.9                                              | 10               | /                                   | 57        |
| D-C-1100                   | 0.1 M KHCO <sub>3</sub>  | -0.6                     | 94.5%                   | ~0.9                                             | 10               | -0.6 ~ -0.7                         | 58        |
| CN-H-CNTs                  | 0.1 M KHCO <sub>3</sub>  | -0.5                     | 88%                     | ~0.4                                             | 7                | /                                   | 59        |
| Ag/CNT COOH                | 0.1 M KHCO <sub>3</sub>  | -1.1                     | 83%                     | ~17                                              | 10               | /                                   | 60        |
| AgNPs@PAM                  | 0.1 M KHCO <sub>3</sub>  | -0.89                    | 97.2%                   | ~22                                              | 48               | -0.79 ~ -1.09                       | 61        |
| Au/Py-CNTs-O               | 0.1 M KHCO <sub>3</sub>  | -0.59                    | 93%                     | ~7                                               | 10               | -0.58 ~ -0.98                       | 62        |
| H-Zn-NPs                   | 0.1 M KHCO <sub>3</sub>  | -0.96                    | 94.2%                   | ~5                                               | 12               | -0.76 ~ -1.06                       | 63        |
